# Supplementary material
Source: Research Square preprint supplement (doi:10.21203/rs.3.rs-9226844/v1)
Supplement: Supplementary file 2 [file 7c54b1e428f07c2f9212f18b.docx]

**Supplementary Methods**

Online Resource 2: Technical Methods for Globe Movement Analysis

# 1. Corvis ST Spatial Geometry

## 1.1 Measurement Configuration

The Corvis ST captures corneal cross-sections using a high-speed Scheimpflug camera at 4,330 frames per second. Each measurement comprises 140 temporal frames spanning approximately 32 ms. The spatial domain consists of 572 discrete sampling points across the horizontal corneal meridian.

### Spatial Mapping

| **Parameter** | **Value** |
| --- | --- |
| Total columns | 572 |
| Left edge position (column 0) | x = −4.000 mm |
| Right edge position (column 571) | x = +3.998 mm |
| Total measurement width | 7.998 mm |
| Spatial resolution | 0.01399 mm/column |

The column-to-position transformation is:

*x(c) = −4.000 + c × (7.998/571) mm*

where c is the column index (0–571).

### Edge Measurement Regions

Peripheral displacement is extracted from edge regions to capture globe movement unaffected by central corneal deformation.

| **Region** | **Columns** | **Centre Position** |
| --- | --- | --- |
| Left edge | 0–29 | −3.797 mm |
| Right edge | 542–571 | +3.793 mm |

The span between measurement centres:

*EDGE_SPAN = 3.793 − (−3.797) = 7.590 mm*

## 1.2 Eye Orientation Convention

The Corvis ST image orientation differs between right and left eyes. For the right eye (OD), the left side of the image corresponds to temporal and the right side to nasal. For the left eye (OS), this is reversed: left corresponds to nasal and right to temporal.

Nasal and temporal displacements are assigned accordingly:

OD: temporal = left edge displacement; nasal = right edge displacement

OS: nasal = left edge displacement; temporal = right edge displacement

## 1.3 Displacement Matrix Structure

The Corvis ST exports displacement data as a matrix M with dimensions 140 × 572, where rows index time (frames 0–139) and columns index horizontal position (columns 0–571). Values represent posterior displacement in micrometres (µm), with positive values indicating posterior movement.

Frame interval: Δt = 1/4330 Hz = 0.231 ms

# 2. Ocular Response Decomposition

The total ocular response to air-puff loading is modelled as a linear superposition of three components:

*LOR(c,t) = LOR(c,0) + LBM(c,t) + LCD(c,t)*

| **Component** | **Description** |
| --- | --- |
| LOR(c,0) | Baseline corneal geometry at t = 0 |
| LBM(c,t) | Whole eye movement (translation + rotation) |
| LCD(c,t) | True corneal deflection from air puff |

The objective of WEM separation is to isolate LBM(c,t) and subtract it from the total response to obtain pure corneal deformation LCD(c,t).

# 3. WEM Separation Methods

Nine methods were implemented for separating whole eye movement from true corneal deformation.

## 3.1 Traditional Edge Averaging

Globe movement is estimated as the average displacement of the outermost corneal points, assuming pure translation:

*WEM(t) = [d_left(t) + d_right(t)] / 2*

Limitation: Cannot account for asymmetric movement or rotation.

## 3.2 Linear Regression

For each time frame, a linear model incorporating translation and tilt is fitted to the peripheral displacement profile:

*d(c,t) = α(t) + β(t) · x(c)*

where α(t) represents translation at the corneal centre and β(t) represents tilt.

## 3.3 Robust Regression

Identical to linear regression but uses iteratively reweighted least squares with Huber loss function to reduce sensitivity to outliers at corneal edges.

## 3.4 Adaptive Edge Selection

Dynamically selects which peripheral columns to include based on deformation magnitude, excluding regions affected by the air-puff indentation crater.

## 3.5 Cross-Correlation Alignment

Aligns each frame to baseline geometry using cross-correlation to find the optimal rigid shift, providing a non-parametric estimate of globe displacement.

## 3.6 Frequency-Domain Filtering

Separates globe movement (low spatial frequency) from corneal deformation (higher spatial frequency) using low-pass filtering in the Fourier domain.

## 3.7 Viscoelastic Modelling

Models the globe as a Kelvin-Voigt viscoelastic body responding to the measured air-puff force profile:

*mẍ + cẋ + kx = F(t)*

Parameters (effective mass m, damping coefficient c, spring constant k) are estimated by fitting to peripheral displacement data.

## 3.8 Adaptive-Viscoelastic Hybrid

Combines adaptive edge selection with viscoelastic modelling for robust estimation.

## 3.9 Adaptive-Robust Hybrid

Combines adaptive edge selection with robust regression.

## 3.10 Method Evaluation and Selection

Performance was evaluated using root-mean-square (RMS) residuals in peripheral regions where true corneal deformation should be minimal:

*RMS = √[(1/NT) Σ_t Σ_c [M_corrected(c,t)]²]*

For each measurement, the method achieving the lowest RMS was selected for subsequent analysis.

# 4. Peripheral Displacement Extraction

## 4.1 Procedure

1. Extract edge regions: Average displacement across the left (columns 0–29) and right (columns 542–571) peripheral regions for each frame.

2. Calculate displacement from baseline:

*d(t) = (1/30) Σ_c∈edge [M(t,c) − M(0,c)]*

3. Baseline correction: Subtract the mean of the first 5 frames to ensure displacement starts at zero.

4. Assign nasal/temporal: Based on eye (OD/OS), assign left and right edge displacements to nasal and temporal.

Output: Two time-series arrays (length 140) representing nasal d_N(t) and temporal d_T(t) peripheral displacement.

# 5. Nasal-Temporal Asymmetry

## 5.1 Parameters

| **Parameter** | **Formula** | **Units** |
| --- | --- | --- |
| Nasal amplitude | max|d_N(t)| | µm |
| Temporal amplitude | max|d_T(t)| | µm |
| N:T ratio | A_N / A_T | — |
| N−T difference | A_N − A_T | µm |

## 5.2 Interpretation

N:T < 1.0 indicates greater temporal than nasal displacement. The population mean N:T ≈ 0.73 indicates temporal displacement exceeds nasal by approximately 42%.

# 6. Translation-Rotation Decomposition

## 6.1 Physical Model

Globe movement comprises two components:

1. Translation (T): Uniform posterior displacement of the entire globe

2. Rotation (θ): Globe rotation about the corneal centre

### Geometric Basis

For small rotation angles, peripheral displacements are related to translation and rotation by:

*d_N(t) = T(t) + r · θ(t)*

*d_T(t) = T(t) − r · θ(t)*

where r = EDGE_SPAN/2 = 3.795 mm is the lever arm from the rotation centre to the measurement position.

## 6.2 Derivation

Translation (symmetric component):

*T(t) = [d_N(t) + d_T(t)] / 2*

Rotation angle (antisymmetric component):

*θ(t) = [d_N(t) − d_T(t)] / (2r)*

Or equivalently:

*θ(t) = arctan[(d_N(t) − d_T(t)) / EDGE_SPAN]*

For typical displacement differences (<100 µm over 7.59 mm span), the small-angle approximation is valid (θ < 1°).

## 6.3 Sign Convention

| **Quantity** | **Positive Value Indicates** |
| --- | --- |
| Displacement (d_N, d_T) | Posterior movement |
| Translation (T) | Globe moving posteriorly |
| Rotation (θ) | Nasal side rotating posteriorly (nasal-ward tilt) |

## 6.4 Parameters

| **Parameter** | **Formula** | **Units** |
| --- | --- | --- |
| Translation amplitude | max|T(t)| | µm |
| Rotation amplitude | max|θ(t)| | degrees |
| Peak rotation value | θ(t_peak) | degrees |
| Initial rotation direction | sign(θ_peak) | nasal/temporal |
| Rotation reversal count | zero crossings in θ(t) | integer |

# 7. Temporal Dynamics

## 7.1 Biphasic Response Pattern

WEM exhibits a biphasic pattern comprising retraction (loading) and protraction (recovery) phases, each subdivided into slow and fast components.

### Phase Definitions

Retraction phase:

• Onset: First frame where displacement exceeds 5% of peak amplitude

• Slow-fast transition: Velocity crosses 20% of maximum retraction velocity

• Peak: Maximum displacement amplitude

Protraction phase:

• Fast-slow transition: Velocity decreases to 20% of maximum protraction velocity

• End: Final measurement frame

## 7.2 Velocity Calculation

Velocity is computed using central difference differentiation of the smoothed displacement signal:

*v(t) = [WEM(t+1) − WEM(t−1)] / (2Δt)*

Smoothing uses a Savitzky-Golay filter (window = 7 frames, polynomial order = 3) to reduce noise while preserving temporal features.

## 7.3 Parameters

Retraction phase:

| **Parameter** | **Definition** |
| --- | --- |
| Onset time | First frame exceeding 5% of peak |
| Slow phase duration | Onset → transition |
| Fast phase duration | Transition → peak |
| Max retraction velocity | Most negative velocity before peak |

Protraction phase:

| **Parameter** | **Definition** |
| --- | --- |
| Max protraction velocity | Most positive velocity after peak |
| Fast phase duration | Peak → transition |
| Slow phase duration | Transition → end |

Recovery metrics:

| **Parameter** | **Definition** |
| --- | --- |
| Return percentage | % of peak displacement recovered by measurement end |
| Time to 50% recovery | Time from peak to 50% return |
| Time to 90% recovery | Time from peak to 90% return |
| Final displacement | Residual displacement at measurement end |

# 8. WEM Oscillation Analysis

## 8.1 Rationale

High-frequency oscillations in WEM velocity reflect viscoelastic properties of orbital tissues. Quantifying these oscillations provides insight into orbital biomechanics.

## 8.2 Analysis Windows

| **Phase** | **Frame Range** | **Description** |
| --- | --- | --- |
| Loading | Frame 5 → peak | Oscillations during globe retraction |
| Recovery | Peak → frame 135 | Post-peak oscillations |

## 8.3 Algorithm

1. Baseline correction: Subtract mean of first 5 frames from WEM displacement

2. Smoothing: Apply Savitzky-Golay filter (window = 7, order = 3)

3. Velocity calculation: Central difference differentiation

4. Detrending: Remove linear trend to isolate oscillatory component

5. Peak detection: Identify peaks and troughs using prominence threshold (0.15 × standard deviation of detrended signal)

6. Oscillation count: Number of complete cycles = min(peaks, troughs)

7. Amplitude: Mean of absolute peak and trough values

8. Frequency analysis: Welch power spectral density estimation; dominant frequency identified as peak within 10–200 Hz band

## 8.4 Classification

| **Category** | **Oscillation Count** |
| --- | --- |
| Low | < 2 |
| Moderate | 2–4 |
| High | > 4 |

## 8.5 Parameters

| **Parameter** | **Units** |
| --- | --- |
| Oscillation count (total) | integer |
| Oscillation count (loading phase) | integer |
| Oscillation count (recovery phase) | integer |
| Oscillation amplitude (velocity) | µm/ms |
| Oscillation amplitude (displacement) | µm |
| Dominant frequency | Hz |
| Classification | category |

# 9. Spatial Crater Analysis

## 9.1 Crater Centre Location

The deformation crater centre is determined as the displacement-weighted mean position at the frame of maximum corneal indentation:

*crater_centre = Σ_c[x(c) · w(c)] / Σ_c[w(c)]*

where weights w(c) are the absolute values of negative (inward) deformations.

Crater offset from the corneal centre is classified as:

• Central: |offset| < 0.2 mm

• Nasal or temporal: |offset| ≥ 0.2 mm (direction based on eye)

## 9.2 Corneal Inclination

Baseline corneal tilt is calculated from the difference in edge heights at frame 0:

*θ_inclination = arctan[(h_right − h_left) / 7.59 mm]*

## 9.3 Crater Extent

The crater boundary is defined where deformation exceeds 10% of maximum depth. Extent asymmetry compares the spread toward nasal versus temporal peripheries:

*extent_asymmetry = right_extent − left_extent*

## 9.4 Parameters

| **Parameter** | **Units** | **Description** |
| --- | --- | --- |
| Crater centre | mm | Position of maximum deformation |
| Crater offset | mm | Deviation from corneal centre |
| Crater direction | category | Nasal/temporal/central |
| Crater width | mm | Total extent of deformation zone |
| Extent asymmetry | mm | Difference in nasal vs temporal spread |
| Corneal inclination | degrees | Baseline tilt angle |
| Curvature asymmetry ratio | — | Left/right curvature balance |

# 10. Complete Parameter Reference

## 10.1 Globe Movement Parameters

| **Parameter** | **Units** |
| --- | --- |
| WEM_Nasal_Amplitude_um | µm |
| WEM_Temporal_Amplitude_um | µm |
| WEM_True_NT_Ratio | — |
| WEM_Nasal_Temporal_Diff_um | µm |
| WEM_Translation_Amplitude_um | µm |
| WEM_Rotation_Amplitude_deg | degrees |
| WEM_Peak_Rotation_Value_deg | degrees |
| WEM_Initial_Rotation_Direction | nasal/temporal |
| WEM_Rotation_Reversal_Count | integer |

## 10.2 Temporal Dynamics Parameters

| **Parameter** | **Units** |
| --- | --- |
| WEM_Onset_Time_ms | ms |
| WEM_Peak_Time_ms | ms |
| WEM_Peak_Amplitude_um | µm |
| WEM_Retraction_Slow_Phase_Duration_ms | ms |
| WEM_Retraction_Fast_Phase_Duration_ms | ms |
| WEM_Max_Retraction_Velocity_um_per_ms | µm/ms |
| WEM_Max_Protraction_Velocity_um_per_ms | µm/ms |
| WEM_Return_Percentage | % |
| WEM_Time_to_50pct_Recovery_ms | ms |
| WEM_Time_to_90pct_Recovery_ms | ms |
| WEM_Final_Displacement_um | µm |

## 10.3 Oscillation Parameters

| **Parameter** | **Units** |
| --- | --- |
| WEM_Oscillation_Count | integer |
| WEM_Oscillation_Count_Loading | integer |
| WEM_Oscillation_Count_Recovery | integer |
| WEM_Oscillation_Amplitude_um_per_ms | µm/ms |
| WEM_Oscillation_Amplitude_um | µm |
| WEM_Dominant_Frequency_Hz | Hz |
| WEM_Oscillation_Classification | category |

## 10.4 Spatial Parameters

| **Parameter** | **Units** |
| --- | --- |
| Crater_Center_mm | mm |
| Crater_Offset_mm | mm |
| Crater_Direction | category |
| Crater_Width_mm | mm |
| Crater_Extent_Asymmetry_mm | mm |
| Cornea_Inclination_deg | degrees |
| Curvature_Asymmetry_Ratio | — |

# 11. Analysis Constants

| **Constant** | **Value** | **Description** |
| --- | --- | --- |
| Frame rate | 4330 Hz | Temporal sampling |
| Frame interval | 0.231 ms | Time between frames |
| Total frames | 140 | Frames per measurement |
| Total columns | 572 | Spatial sampling points |
| Edge width | 30 columns | Peripheral region for extraction |
| Edge span | 7.59 mm | Distance between edge centres |
| Lever arm | 3.795 mm | Half-span for rotation calculation |
| Baseline frames | 5 | Frames for baseline correction |
| Onset threshold | 5% | Of peak for movement onset |
| Velocity transition | 20% | Of max for phase transitions |
| Oscillation prominence | 0.15 × SD | Peak detection sensitivity |
| Crater threshold | 10% | Of max for boundary definition |
