# Supplementary material
Source: Research Square preprint supplement (doi:10.21203/rs.3.rs-9226844/v1)
Supplement: Supplementary file 3 [file d6d2a584a3d820149c0a0276.docx]

**STROBE Statement—Checklist of items that should be included in reports of cross-sectional studies**

**Online Resource 3**

*Whole eye movement analysis during Corvis ST tonometry: translation-rotation decomposition and nasal-temporal asymmetry*

| **Item No** | **Recommendation** | **Page No** | **Comment** |
| --- | --- | --- | --- |
| ***Title and abstract*** | | | |
| **1(a)** | Indicate the study’s design with a commonly used term in the title or the abstract | 1 | Cross-sectional stated in title and abstract |
| **1(b)** | Provide in the abstract an informative and balanced summary of what was done and what was found | 1 | Structured abstract with objectives, methods, results, conclusions |
| ***Introduction*** | | | |
| **2** | Explain the scientific background and rationale for the investigation being reported | 2–4 | Background on corneal biomechanics, Corvis ST, WEM limitations |
| **3** | State specific objectives, including any prespecified hypotheses | 4 | Three specific objectives stated |
| ***Methods*** | | | |
| **4** | Present key elements of study design early in the paper | 4 | Cross-sectional observational study stated |
| **5** | Describe the setting, locations, and relevant dates, including periods of recruitment, exposure, follow-up, and data collection | 4 | University of Plymouth, single visit, 2024 |
| **6(a)** | Give the eligibility criteria, and the sources and methods of selection of participants | 4–5 | Inclusion/exclusion criteria described |
| **7** | Clearly define all outcomes, exposures, predictors, potential confounders, and effect modifiers. Give diagnostic criteria, if applicable | 5–7 | All WEM parameters defined, measurement methods detailed |
| **8*** | For each variable of interest, give sources of data and details of methods of assessment (measurement). Describe comparability of assessment methods if there is more than one group | 5–6 | Corvis ST and Heidelberg Spectrometer described |
| **9** | Describe any efforts to address potential sources of bias | 7 | Automated analysis pipeline, standardised protocols |
| **10** | Explain how the study size was arrived at | 5 | n=68 overall, n=20 for repeatability; logistical constraints noted |
| **11** | Explain how quantitative variables were handled in the analyses. If applicable, describe which groupings were chosen and why | 7–8 | Continuous variables described, normality testing |
| **12(a)** | Describe all statistical methods, including those used to control for confounding | 7–8 | ICC, Bland-Altman, paired t-tests, correlation analyses |
| **12(b)** | Describe any methods used to examine subgroups and interactions | 8 | Subgroup analysis by eye laterality |
| **12(c)** | Explain how missing data were addressed | 7 | Complete data for all participants |
| **12(d)** | If applicable, describe analytical methods taking account of sampling strategy | 7 | Not applicable (consecutive sampling) |
| **12(e)** | Describe any sensitivity analyses | 7–8 | Multiple WEM separation methods compared as sensitivity analysis |
| ***Results*** | | | |
| **13(a)** | Report numbers of individuals at each stage of study—eg numbers potentially eligible, examined for eligibility, confirmed eligible, included in the study, completing follow-up, and analysed | 9 | 68 participants, both eyes, complete data for all |
| **13(b)** | Give reasons for non-participation at each stage | 9 | No non-participation reported |
| **13(c)** | Consider use of a flow diagram | N/A | Not required for this sample size and design |
| **14(a)*** | Give characteristics of study participants (eg demographic, clinical, social) and information on exposures and potential confounders | 9, Table 1 | Demographics and clinical characteristics reported |
| **14(b)*** | Indicate number of participants with missing data for each variable of interest | 9 | No missing data |
| **15*** | Report numbers of outcome events or summary measures | 9–15, Tables 2–9 | WEM parameters reported with descriptive statistics |
| **16(a)** | Give unadjusted estimates and, if applicable, confounder-adjusted estimates and their precision (eg, 95% confidence interval). Make clear which confounders were adjusted for and why they were included | 9–15 | ICC with 95% CI, mean differences with limits of agreement |
| **16(b)** | Report category boundaries when continuous variables were categorized | N/A | Continuous variables not categorized |
| **16(c)** | If relevant, consider translating estimates of relative risk into absolute risk for a meaningful comparison period | N/A | No relative risk estimates |
| **17** | Report other analyses done—eg analyses of subgroups and interactions, and sensitivity analyses | 15–18 | Method comparison, laterality analysis, oscillation analysis |
| ***Discussion*** | | | |
| **18** | Summarise key results with reference to study objectives | 18–19 | Key findings summarised |
| **19** | Discuss limitations of the study, taking into account sources of potential bias or imprecision. Discuss both direction and magnitude of any potential bias | 20–21 | Limitations discussed: sample size, single device, cross-sectional design, absence of power calculation |
| **20** | Give a cautious overall interpretation of results considering objectives, limitations, multiplicity of analyses, results from similar studies, and other relevant evidence | 21–22 | Cautious interpretation with clinical context provided |
| **21** | Discuss the generalisability (external validity) of the study results | 22 | Generalisability discussed: healthy eyes, single ethnicity, young cohort |
| ***Other information*** | | | |
| **22** | Give the source of funding and the role of the funders for the present study and, if applicable, for the original study on which the present article is based | 24 | University of Plymouth funded; funders had no role in study design, data collection, analysis, or manuscript preparation |

**Give information separately for exposed and unexposed groups.*

*Note: An Explanation and Elaboration article discusses each checklist item and gives methodological background and published examples of transparent reporting. The STROBE checklist is best used in conjunction with this article (freely available on the Web sites of PLoS Medicine at http://www.plosmedicine.org/, Annals of Internal Medicine at http://www.annals.org/, and Epidemiology at http://www.epidem.com/). Information on the STROBE Initiative is available at www.strobe-statement.org.*
